# Supplementary material for: Factors associated with reduction in quality of life after SARS-CoV-2 infection
Source: Springer Nature journal article supplement (doi:10.1038/s41598-025-91388-z), 2025-02-25
Supplement: MOESM1 [file 41598_2025_91388_MOESM1_ESM.pdf]

# Supplementary Information

## Factors Associated with Reduction in Quality of Life After SARS-CoV-2 Infection

Christian Neumann, MSc<sup>a,\*</sup>, Tim J. Hartung, MD MA<sup>b,c,\*</sup>, Klara Boje, BSc<sup>d</sup>, Thomas Bahmer, MD<sup>e,f</sup>, Julian Keil, PhD<sup>d</sup>, Wolfgang Lieb, MD MSc<sup>g</sup>, Katrin Franzpoetter, MSc<sup>g</sup>, Julius Welzel, MSc<sup>a</sup>, Irina Chaplinskaya-Sobol, MSc<sup>h</sup>, Matthias Endres, MD<sup>b,i,j,k,l,m</sup>, Johanna Geritz, PhD<sup>a</sup>, Karl Georg Haeusler, MD<sup>n</sup>, Peter Heuschmann, MD<sup>o,p,q</sup>, Andreas Hinz, PhD<sup>c</sup>, Sina Hopff, MD<sup>r</sup>, Anna Horn<sup>o,q</sup>, Carolin Nuernberger, MSc<sup>o,q</sup>, Lena Schmidbauer, MSc<sup>o,q</sup>, Michael Krawczak, PhD<sup>s</sup>, Anne-Kathrin Ruß, MSc<sup>g,s</sup>, Lilian Krist, MD<sup>s</sup>, Thomas Keil<sup>t</sup>, Jennifer Kudelka, MD<sup>a</sup>, Corina Maetzler, MA<sup>a</sup>, Anja Mehnert-Theuerkauf, PhD<sup>c</sup>, Felipe A. Montellano, MD<sup>n,o,u</sup>, Caroline Morbach, MD<sup>u,v</sup>, Sein Schmidt, MD<sup>w</sup>, Jan Heyckendorf, MD<sup>e,f</sup>, Flo Steigerwald<sup>b</sup>, Stefan Stoerk, MD, PhD<sup>u,v</sup>, Christina Lemhoefer MD<sup>x</sup>, Stefan Schreiber, MD<sup>e</sup>, Carsten Finke, MD<sup>b†</sup> Walter Maetzler, MD<sup>a†</sup>

*a Neurology Department, University Medical Center Schleswig-Holstein, Campus Kiel, Arnold-Heller-Str. 3, 24105 Kiel, Germany*

*b Charité-Universitätsmedizin Berlin, Department of Neurology and Experimental Neurology, Bonhoefferweg 3, 10117 Berlin, Germany*

*c Department of Medical Psychology and Medical Sociology, University Medical Center Leipzig, Philipp-Rosenthal-Str. 55, 04103 Leipzig Germany*

*d Department of general Psychologie I and Biological Psychology, Christian-Albrechts-Universität zu Kiel, Neufeldstraße 4a, 24118 Kiel, Germany*

*e Internal Medicine Department I, Leibniz Lung Clinic, University Hospital Schleswig Holstein, Campus Kiel, Arnold-Heller-Str. 3, 24105 Kiel, Germany*

*f Airway Research Center North (ARCN), German Center for Lung Research (DZL), Woehrendamm 80, 22927 Grosshansdorf, Germany*

*g Institute for Epidemiology, Christian-Albrechts-University Kiel, Niemannsweg 11, 24105 Kiel, Germany*

*h Department of Medical Informatics, University Medical Center Goettingen, Von-Siebold-Str. 3, 37075 Goettingen, Germany*

*i Center for Stroke Research Berlin, Charitéplatz 1, 10117 Berlin, Germany*

*j Excellence Cluster NeuroCure, Charitéplatz 1, 10117 Berlin, Germany*

*k German Center for Neurodegenerative Diseases (DZNE), partner site Berlin, Charitéplatz 1, 10117 Berlin, Germany*

*l German Centre for Cardiovascular Research (DZHK), partner site Berlin, Charitéplatz 1, 10117 Berlin, Germany*

*m German Centre for mental health (DZPG), partner site Berlin, Charitéplatz 1, 10117 Berlin, Germany*

*n University of Ulm, Department of Neurology, Oberer Eselsberg 45, 89081 Ulm, Germany*

*o University of Wuerzburg, Institute of Clinical Epidemiology and Biometry, Josef-Schneider-Str. 2, 97080 Wuerzburg, Germany*

*p University Hospital Wuerzburg, Clinical Trial Center, Oberduerrbacher Str. 6, 97080 Wuerzburg, Germany*

*q University Hospital Wuerzburg, Institute for medical Data Science, Josef-Schneider-Str. 2, 97080 Wuerzburg, Germany*

*r University of Cologne, Faculty of Medicine and University Hospital Cologne, Department I of Internal Medicine, Center for Integrated Oncology Aachen Bonn Cologne Duesseldorf, Kerpener Str. 62, Germany*

*s Institute of Medical Informatics and Statistics, Kiel University, University Medical Center Schleswig-Holstein Campus Kiel, Arnold-Heller-Str. 3, 24105 Kiel, Germany*

*t Institute of Social Medicine, Epidemiology and Health Economics, Charité-Universitätsmedizin Berlin, Schumannstr. 20, 10117 Berlin, Germany*

*u University Hospital Wuerzburg, Department Clinical Research and Epidemiology, Comprehensive Heart Failure Center, Am Schwarzenberg 15, 97080 Wuerzburg, Germany*

*v University Hospital Wuerzburg, Department for Medicine I, Oberduerrbacher Str. 6, 97080 Wuerzburg, Germany*

*w Berlin Institute of Health at Charité – Universitätsmedizin Berlin, Clinical Study Center, Anna-Louisa-Karsch-Straße 2, 10178 Berlin, Germany*

*x Institute of Physical and Rehabilitation Medicine, Jena University Hospital/Friedrich-Schiller-University Jena, Am Klinikum 1, 07747 Jena, Germany*

\* contributed equally as first authors

† contributed equally as senior authors

### Corresponding author

M. Sc. Christian Neumann  
Klinik fuer Neurologie  
Universitätsklinikum Schleswig-Holstein, Campus Kiel  
Arnold-Heller-Straße 3  
24105 Kiel  
Germany

Phone: ++49+30-450-560216

E-mail: [Christian.Neumann@uksh.de](mailto:Christian.Neumann@uksh.de)

ORCID iD: 0000-0002-5891-1937

## Supplementary Table S1

*Independent variables used in the recursive feature elimination and how they were measured.*

| Variables                                            | Measures                                                              |
|------------------------------------------------------|-----------------------------------------------------------------------|
| <b>Fatigue</b>                                       | <b>FACIT-Fatigue Scale</b>                                            |
| <b>Personal stress</b>                               | <b>PSS total score</b>                                                |
| Cognitive functioning                                | MoCA total score                                                      |
| Subjective cognitive decline                         | Yes, No                                                               |
| Subjective word finding disorder                     | Yes, No                                                               |
| <b>Sex</b>                                           | <b>Male, Female</b>                                                   |
| <b>Age</b>                                           | <b>Years</b>                                                          |
| BMI                                                  | Weight, Height                                                        |
| <b>Employment (At follow-up: Loss of employment)</b> | <b>Employed, Not employed (Yes, No)</b>                               |
| Partner                                              | Yes, No                                                               |
| Vaccinated                                           | Yes, No                                                               |
| More than 12 years education                         | Yes, No                                                               |
| Treatment during initial SARS-CoV-2 infection        | Yes, No                                                               |
| Treatment at home                                    | Yes, No                                                               |
| Stationary treatment                                 | Yes, No                                                               |
| Treatment in intensive care unit                     | Yes, No                                                               |
| Treatment with ventilation                           | Yes, No                                                               |
| Initial infection symptoms                           | Number of symptoms during initial SARS-CoV-2 infection                |
| Time since infection                                 | Days between initial SARS-CoV-2 infection and assessment              |
| <b>Pre-diagnosed diseases</b>                        |                                                                       |
| Any neurological/psychiatric disease                 | Yes, No                                                               |
| COPD                                                 | Yes, No                                                               |
| Sleep apnea                                          | Yes, No                                                               |
| Tumor disease                                        | Yes, No                                                               |
| Depression                                           | Yes, No                                                               |
| Anxiety                                              | Yes, No                                                               |
| Migraine                                             | Yes, No                                                               |
| <b>Remaining symptoms</b>                            | <b>Number of symptoms remaining from initial SARS-CoV-2 infection</b> |
| Smelling disturbance                                 | Yes, No                                                               |
| Impaired sense of taste                              | Yes, No                                                               |
| Stomach pain                                         | Yes, No                                                               |
| Confusion                                            | Yes, No                                                               |
| Diarrhea                                             | Yes, No                                                               |
| Vomiting                                             | Yes, No                                                               |
| Nausea                                               | Yes, No                                                               |
| Vertigo                                              | Yes, No                                                               |
| Coughing                                             | Yes, No                                                               |
| Hoarseness                                           | Yes, No                                                               |
| Sore throat                                          | Yes, No                                                               |
| Running nose                                         | Yes, No                                                               |
| Chills                                               | Yes, No                                                               |
| Muscle pain                                          | Yes, No                                                               |
| Joint pain                                           | Yes, No                                                               |
| Shortness of breath                                  | Yes, No                                                               |
| Wheezing                                             | Yes, No                                                               |
| Chest pain                                           | Yes, No                                                               |
| Rash                                                 | Yes, No                                                               |
| Fever                                                | Yes, No                                                               |
| Headache                                             | Yes, No                                                               |
| Hair loss                                            | Yes, No                                                               |

*Note.* Highlighted variables were also selected for the follow-up Analyses. BMI, Body-Mass-Index; EQ-5D-5L, European Quality of Life 5 Dimensions 5 Level Version; FACIT-Fatigue Scale, Functional Assessment of Chronic Fatigue Illness – Fatigue Subscore; MoCA, Montreal Cognitive Assessment; PSS, Perceived Stress Scale.

## Supplementary Table S2

*Sociodemographic and clinical characteristics of the COVIDOM study sample at baseline.*

| Characteristics [N]                                           | Baseline = 3475      | Follow-Up = 2510    |                     |                 |
|---------------------------------------------------------------|----------------------|---------------------|---------------------|-----------------|
| <b>sex</b>                                                    | <b>Missing = 2</b>   |                     |                     |                 |
| Female [N (%)]                                                | 1944 (56)            |                     | 1422 (57)           |                 |
| Male [N (%)]                                                  | 1529 (44)            |                     | 1088 (43)           |                 |
| <b>Age [years]</b>                                            |                      |                     |                     |                 |
| 18-34 [N (%)]                                                 | 1078 (31)            |                     | 712 (28)            |                 |
| 35-49 [N (%)]                                                 | 952 (27)             |                     | 652 (26)            |                 |
| 50-64 [N (%)]                                                 | 1091 (31)            |                     | 851 (34)            |                 |
| 65-88 [N (%)]                                                 | 354 (10)             |                     | 295 (12)            |                 |
| <b>Unemployment</b>                                           |                      |                     |                     |                 |
| Yes [N (%)]                                                   | 628 (18)             |                     | -                   |                 |
| <b>BMI</b>                                                    | <b>Missing = 39</b>  |                     |                     |                 |
| Underweight [N (%)]                                           | 44 (1)               |                     | -                   |                 |
| Normal weight [N (%)]                                         | 1392 (40)            |                     | -                   |                 |
| Overweight [N (%)]                                            | 1164 (33)            |                     | -                   |                 |
| Obese [N (%)]                                                 | 836 (24)             |                     | -                   |                 |
| <b>Time between initial SARS-CoV-2 infection and baseline</b> |                      |                     |                     |                 |
| 6 – 9 months [N (%)]                                          | 1618 (47)            |                     | -                   |                 |
| 9 – 12 months [N (%)]                                         | 1334 (38)            |                     | -                   |                 |
| ≥12 months [N (%)]                                            | 523 (15)             |                     | -                   |                 |
| <b>Number of initial infection symptoms</b>                   |                      | <b>Missing = 30</b> |                     |                 |
| Asymptomatic [N (%)]                                          | 306 (9)              |                     | 202 (8)             |                 |
| 1 – 5 [N (%)]                                                 | 528 (15)             |                     | 396 (16)            |                 |
| 6 – 8 [N (%)]                                                 | 701 (20)             |                     | 493 (20)            |                 |
| 9 – 11 [N (%)]                                                | 783 (23)             |                     | 560 (22)            |                 |
| 12 – 21 [N (%)]                                               | 1157 (33)            |                     | 829 (33)            |                 |
| <b>Number of remaining symptoms</b>                           |                      |                     |                     |                 |
| Asymptomatic [N (%)]                                          | 1912 (55)            |                     | 1433 (57)           |                 |
| 1 – 5 [N (%)]                                                 | 1353 (39)            |                     | 974 (39)            |                 |
| 6 – 8 [N (%)]                                                 | 155 (4)              |                     | 74 (3)              |                 |
| 9 – 11 [N (%)]                                                | 43 (1)               |                     | 24 (1)              |                 |
| 12 – 21 [N (%)]                                               | 12 (< 1)             |                     | 5 (< 1)             |                 |
| <b>Clinically relevant fatigue (FACIT-Fatigue Scale)</b>      | <b>Missing = 266</b> |                     | <b>Missing = 91</b> |                 |
| Yes                                                           | 689 (20)             |                     | 444 (18)            |                 |
| <b>Pre-diagnosed COVID-19 comorbidity</b>                     |                      | <b>Missings</b>     |                     | <b>Missings</b> |
| Any neurological/psychiatric disorder                         | 841 (24)             | 11                  | 602                 | 110             |
| Depression                                                    | 387 (11)             | 113                 | 290                 | 101             |
| Migraine                                                      | 309 (10)             | 92                  | 220                 | 103             |
| Anxiety                                                       | 108 (3)              | 94                  | 71                  | 83              |
| Apnea                                                         | 146 (4)              | 70                  | 113                 | 101             |

|                                      |                      |                     |    |    |
|--------------------------------------|----------------------|---------------------|----|----|
| COPD                                 | 53 (1)               | 92                  | 38 | 73 |
| Tumor                                | 48 (1)               | 58                  | 30 | 40 |
| <b>EQ-5D-5L “mobility”</b>           | <b>Missing = 176</b> | <b>Missing = 62</b> |    |    |
| No problems                          | 2544 (73)            | 1961 (78)           |    |    |
| Slight problems                      | 459 (13)             | 293 (12)            |    |    |
| Moderate problems                    | 220 (6)              | 150 (6)             |    |    |
| Major problems                       | 73 (2)               | 44 (2)              |    |    |
| Extreme problems                     | 3 (< 1)              | 0 (0)               |    |    |
| <b>EQ-5D-5L “self-care”</b>          | <b>Missing = 172</b> | <b>Missing = 62</b> |    |    |
| No problems                          | 3168 (91)            | 2348 (94)           |    |    |
| Slight problems                      | 91 (3)               | 67 (3)              |    |    |
| Moderate problems                    | 29 (< 1)             | 23 (1)              |    |    |
| Major problems                       | 10 (< 1)             | 9 (< 1)             |    |    |
| Extreme problems                     | 5 (< 1)              | 1 (< 1)             |    |    |
| <b>EQ-5D-5L “usual activities”</b>   | <b>Missing = 177</b> | <b>Missing = 66</b> |    |    |
| No problems                          | 2036 (59)            | 1647 (66)           |    |    |
| Slight problems                      | 756 (22)             | 522 (21)            |    |    |
| Moderate problems                    | 338 (10)             | 176 (7)             |    |    |
| Major problems                       | 150 (4)              | 89 (4)              |    |    |
| Extreme problems                     | 18 (< 1)             | 10 (< 1)            |    |    |
| <b>EQ-5D-5L “pain/discomfort”</b>    | <b>Missing = 170</b> | <b>Missing = 63</b> |    |    |
| No problems                          | 1478 (43)            | 1306 (52)           |    |    |
| Slight problems                      | 1073 (31)            | 684 (27)            |    |    |
| Moderate problems                    | 553 (16)             | 339 (14)            |    |    |
| Major problems                       | 186 (5)              | 108 (4)             |    |    |
| Extreme problems                     | 15 (< 1)             | 10 (< 1)            |    |    |
| <b>EQ-5D-5L “anxiety/depression”</b> | <b>Missing = 178</b> | <b>Missing = 63</b> |    |    |
| No problems                          | 2041 (59)            | 1614 (64)           |    |    |
| Slight problems                      | 802 (23)             | 556 (22)            |    |    |
| Moderate problems                    | 294 (8)              | 179 (7)             |    |    |
| Major problems                       | 132 (4)              | 80 (3)              |    |    |
| Extreme problems                     | 28 (< 1)             | 18 (< 1)            |    |    |

*Note.* BMI, Body-Mass-Index; COPD, chronic obstructive pulmonary disease; EQ-5D-5L, European Quality of Life 5 Dimensions 5 Level Version; FACIT-Fatigue Scale, Functional Assessment of Chronic Fatigue Illness – Fatigue Subscore

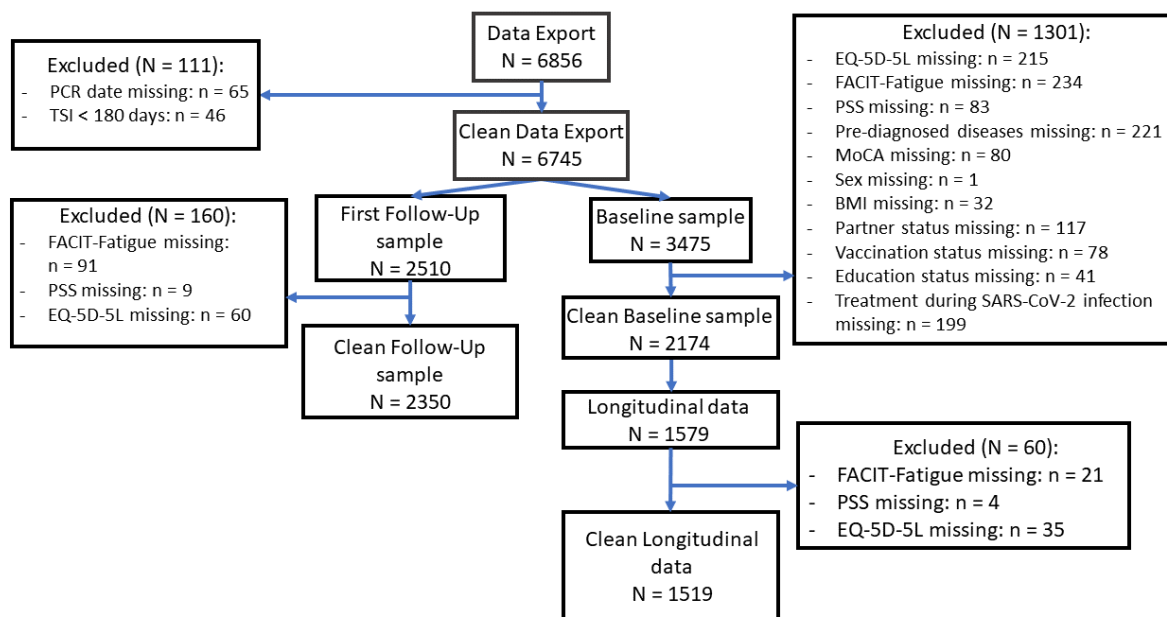

**Supplementary Fig. S3** Steps and sequence of data cleaning for the COVIDOM study samples. BMI, Body-Mass-Index; EQ-5D-5L, European Quality of Life 5 Dimensions 5 Level Version; FACIT-Fatigue Scale, Functional Assessment of Chronic Fatigue Illness – Fatigue Subscore; MoCA, Montreal Cognitive Assessment; PSS, Perceived Stress Scale; TSI, Time since infection

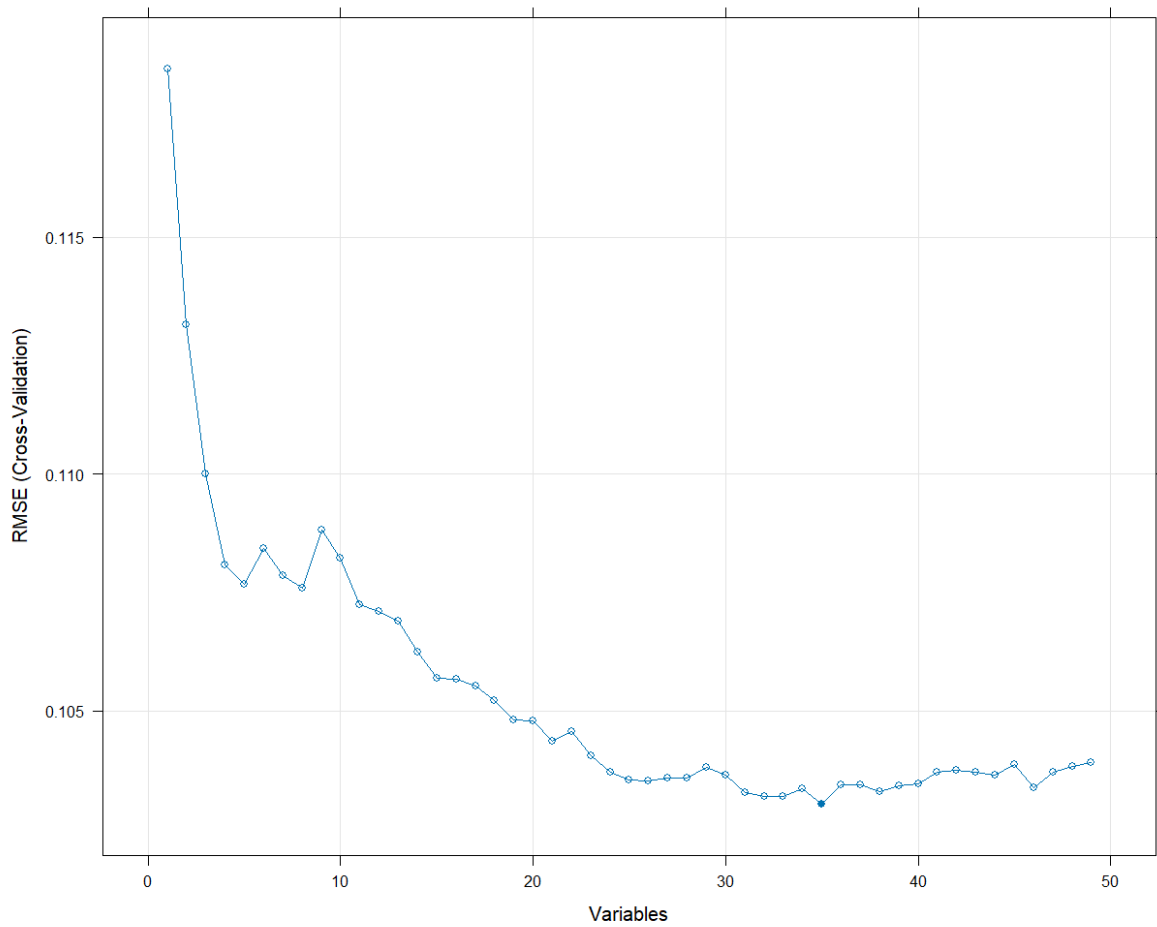

**Supplementary Fig. S4** Root mean square errors (RMSE) of the models calculated by recursive feature elimination using the European Quality of Life 5 Dimensions 5 Level Version (EQ-5D-5L) index at baseline as the dependent variable. It shows the model fit in dependence of the number of selected features. The dark-blue point is the number of features with the lowest RMSE. A 35-variable model was calculated as the model with the lowest RMSE of 0.1 to explain the EQ-5D-5L index. We chose a 5-variable model as the final model because the RMSE with 5 variables is only 0.005 less than the RMSE with 35 variables, while using significantly fewer variables

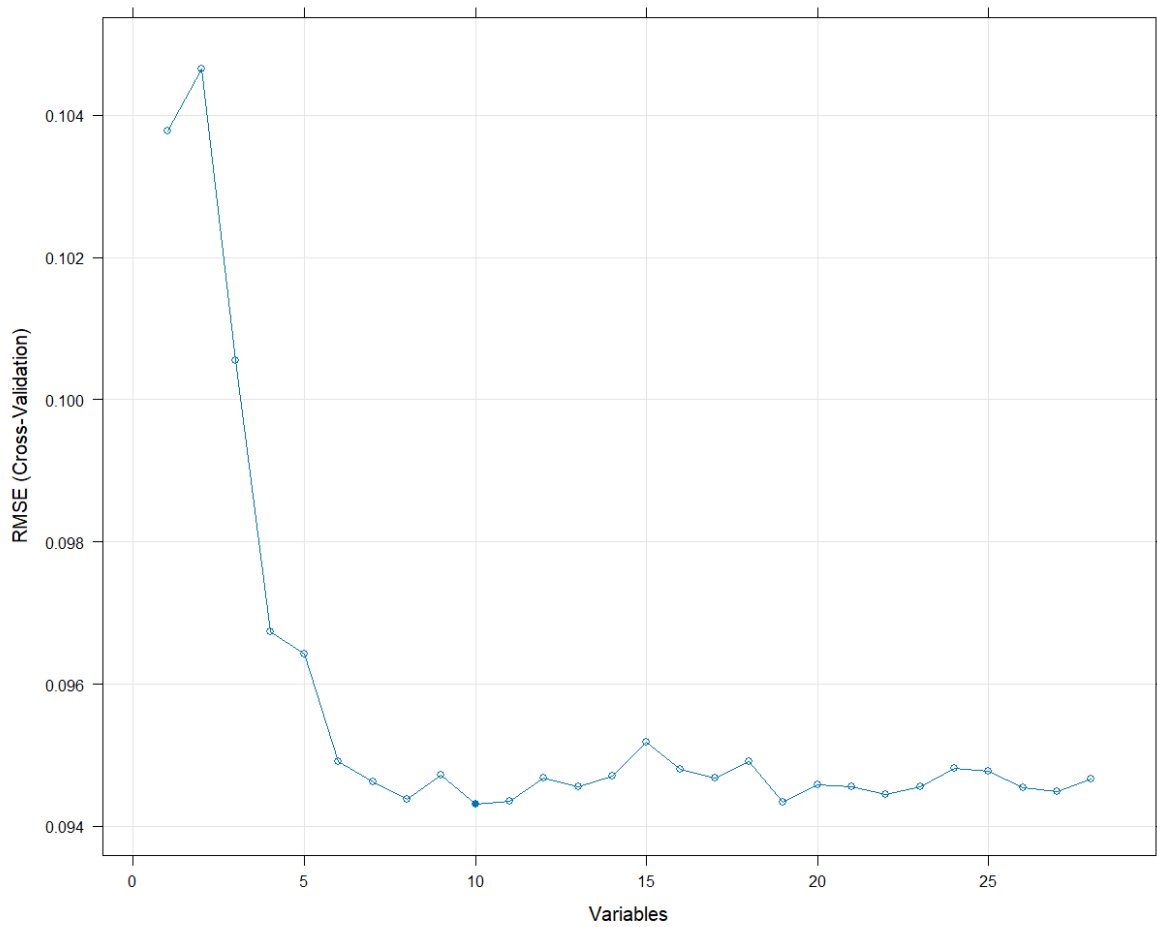

**Supplementary Fig. S5** Root mean square errors (RMSE) of the models calculated by recursive feature elimination using the European Quality of Life 5 Dimensions 5 Level Version (EQ-5D-5L) index at follow-up as the dependent variable. It shows the model fit in dependence of the number of selected features. The dark-blue point is the number of features with the lowest RMSE. A 10-variable model as the model with the lowest RMSE of 0.09 to explain the EQ-5D-5L index. We chose a 6-variable model as the final model because the RMSE with 6 variables was also 0.09, while using significantly fewer variables



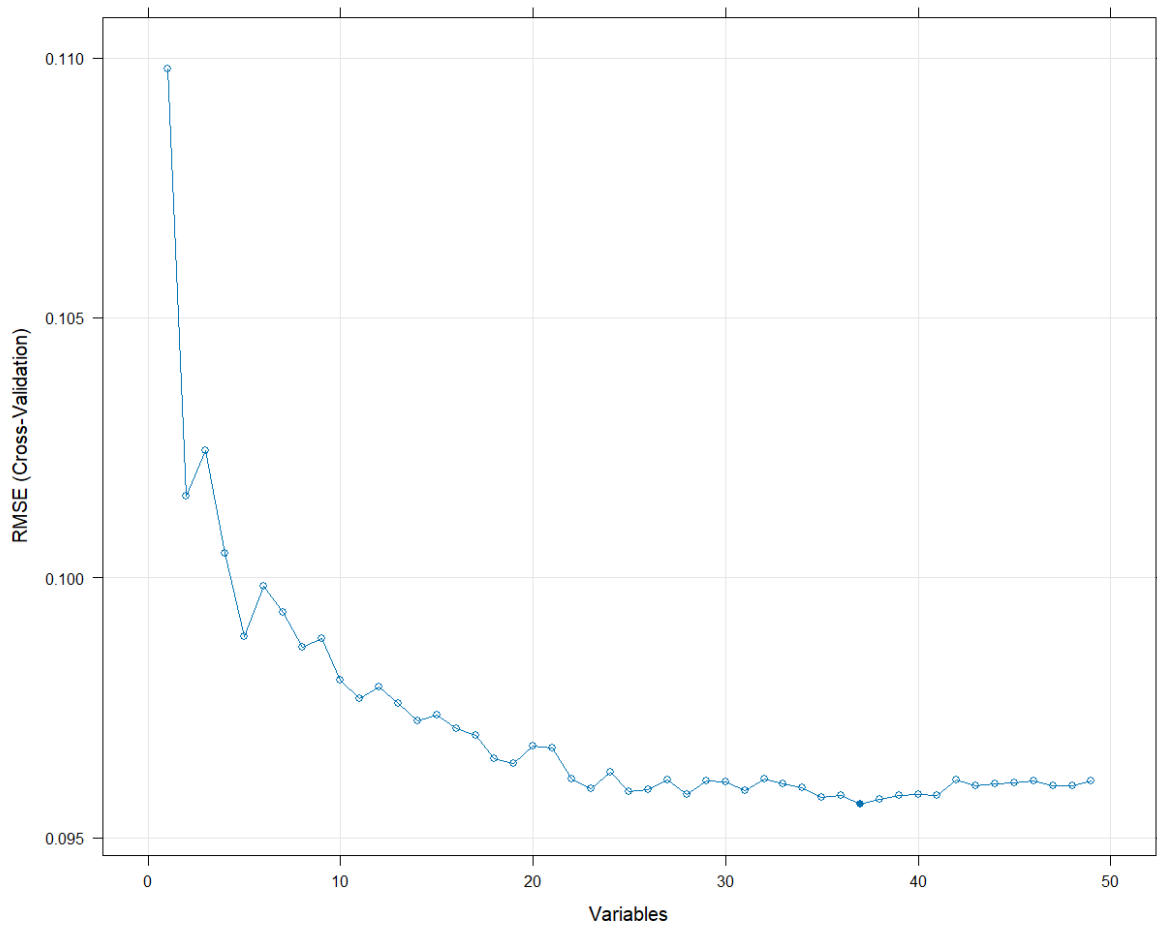

**Supplementary Fig. S6** Root mean square errors (RMSE) of the models calculated by recursive feature elimination using the European Quality of Life 5 Dimensions 5 Level Version (EQ-5D-5L) index at baseline as the dependent variable for participants without a pre-diagnosed anxiety or depression. It shows the model fit in dependence of the number of selected features. The dark-blue point is the number of features with the lowest RMSE. A 37-variable model as the model with the lowest RMSE of 0.1 to explain the EQ-5D-5L index. We chose a 5-variable model as the final model because the RMSE with 6 variables was still 0.1, while using significantly fewer variables

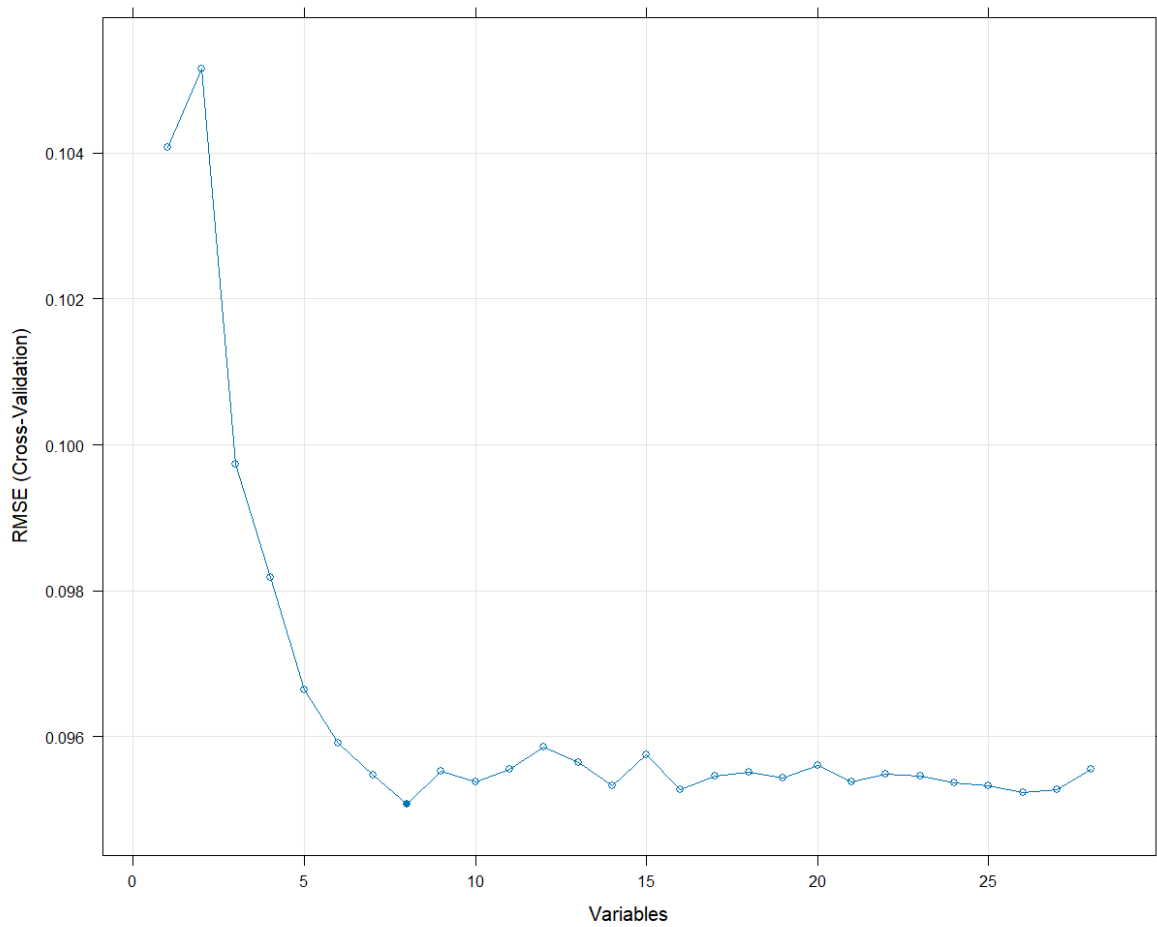

**Supplementary Fig. S7** Root mean square errors (RMSE) of the models calculated by recursive feature elimination using the European Quality of Life 5 Dimensions 5 Level Version (EQ-5D-5L) index at follow-up as the dependent variable for participants without a pre-diagnosed anxiety or depression. It shows the model fit in dependence of the number of selected features. The dark-blue point is the number of features with the lowest RMSE. An 8-variable model as the model with the lowest RMSE of 0.10 to explain the EQ-5D-5L index. We chose a 6-variable model as the final model because the RMSE with 6 variables was only 0.001 less than the RMSE with 8 variables, while using significantly fewer variables

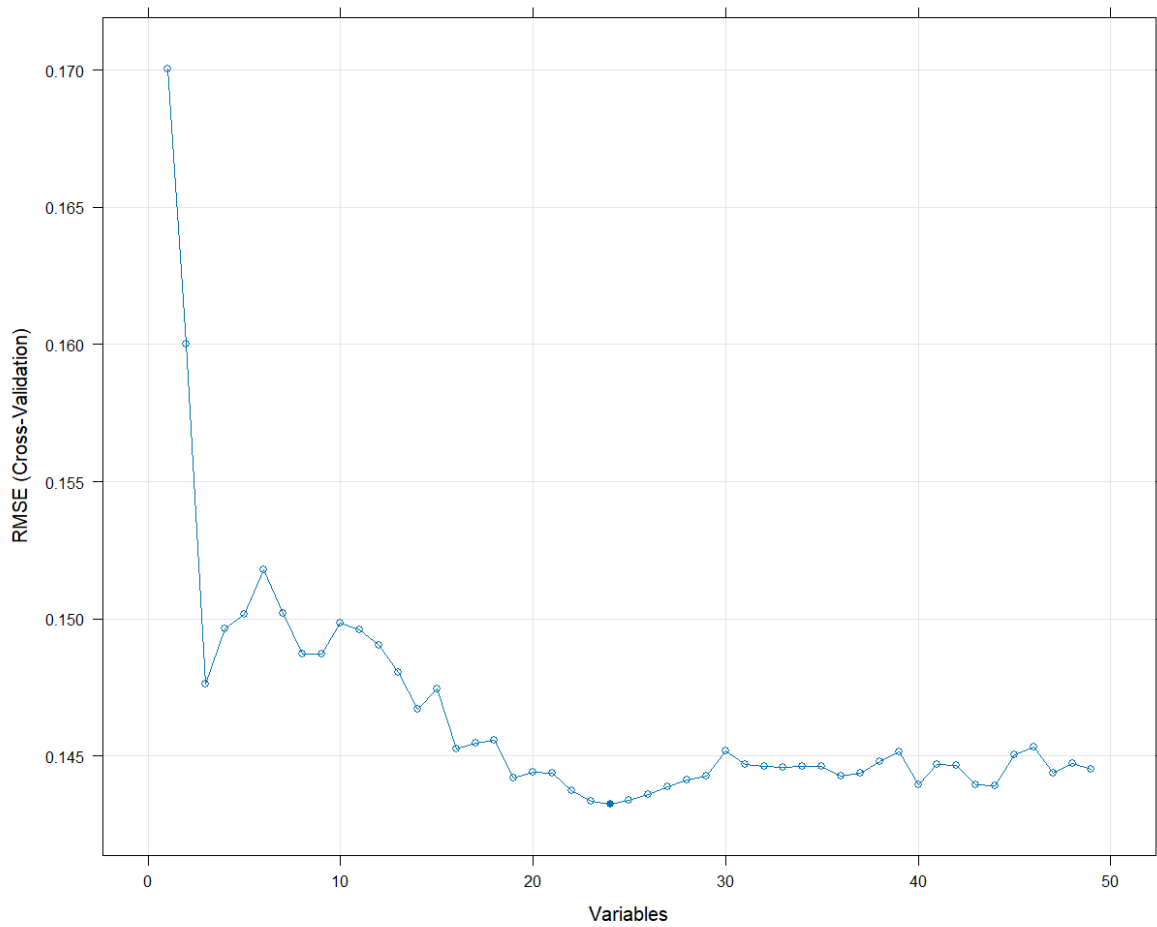

**Supplementary Fig. S8** Root mean square errors (RMSE) of the models calculated by recursive feature elimination using the European Quality of Life 5 Dimensions 5 Level Version (EQ-5D-5L) index at baseline as the dependent variable for participants with a pre-diagnosed anxiety or depression. It shows the model fit in dependence of the number of selected features. The dark-blue point is the number of features with the lowest RMSE. A 24-variable model as the model with the lowest RMSE of 0.14 to explain the EQ-5D-5L index. We chose a 3-variable model as the final model because the RMSE with 3 variables was only 0.004 lower than the RMSE with 24 variables, while using significantly fewer variables

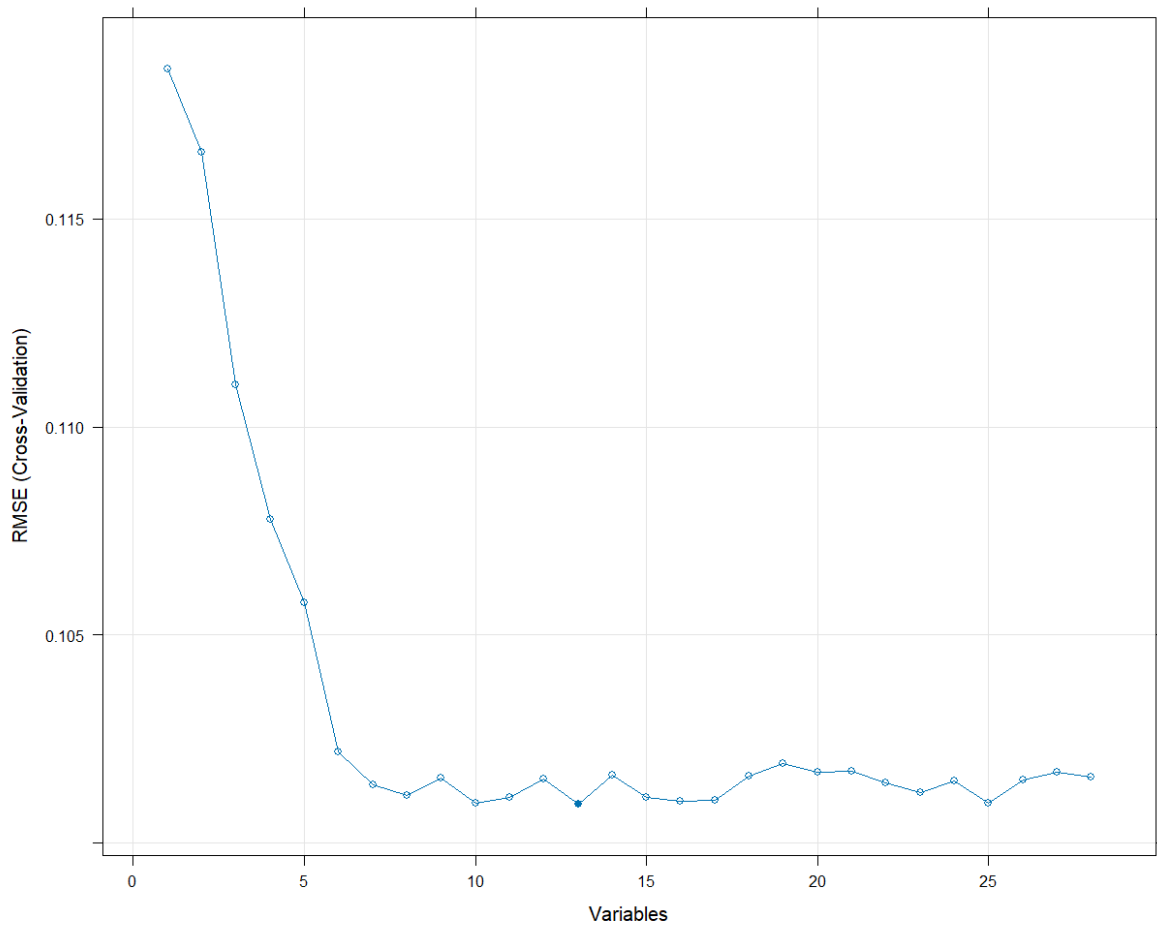

**Supplementary Fig. S9** Root mean square errors (RMSE) of the models calculated by recursive feature elimination using the European Quality of Life 5 Dimensions 5 Level Version (EQ-5D-5L) index at follow-up as the dependent variable for participants with pre-diagnosed anxiety or depression. It shows the model fit in dependence of the number of selected features. The dark-blue point is the number of features with the lowest RMSE. A 13-variable model as the model with the lowest RMSE of 0.10 to explain the EQ-5D-5L index. We chose a 6-variable model as the final model because the RMSE with 6 variables was still 0.10, while using significantly fewer variables

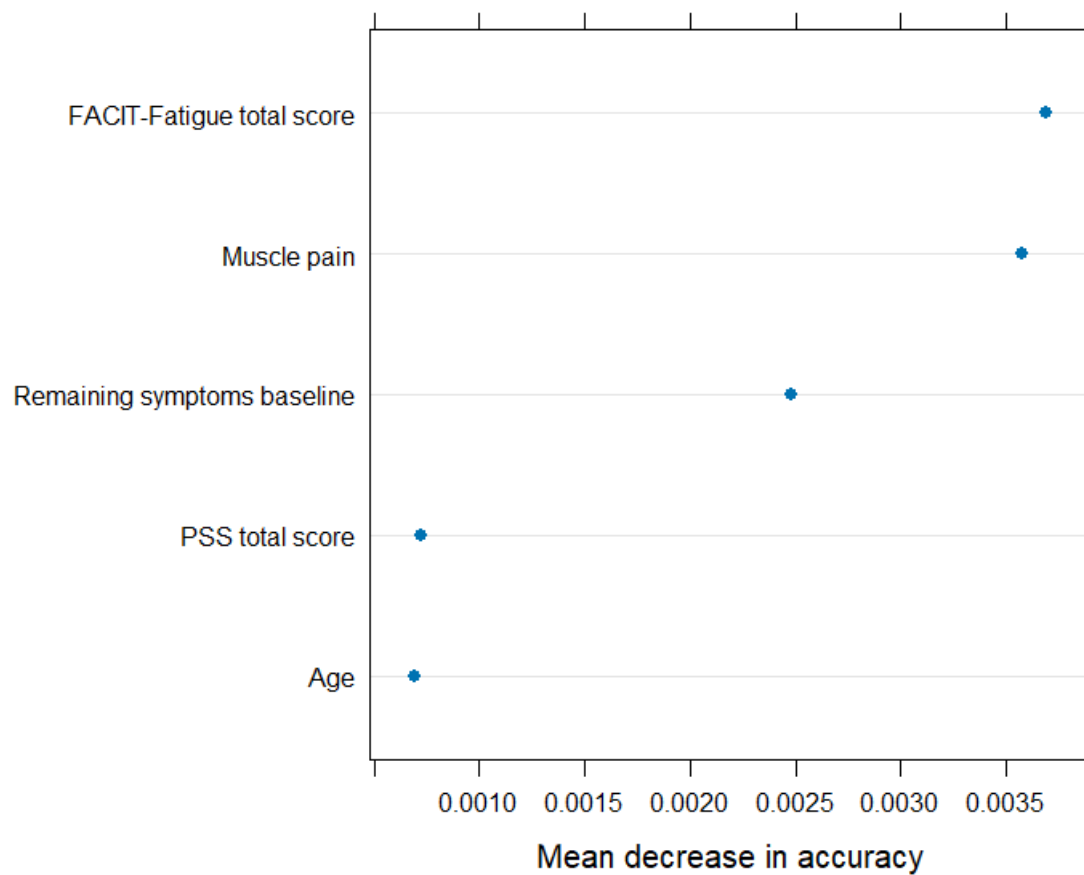

**Supplementary Fig. S10** Mean decrease in accuracy of the selected variables at baseline after a random forest regression on the training set with the European Quality of Life 5 Dimensions 5 Level Version index as the dependent variable. FACIT-Fatigue Scale, Functional Assessment of Chronic Fatigue Illness – Fatigue Subscore; PSS, Perceived Stress Scale

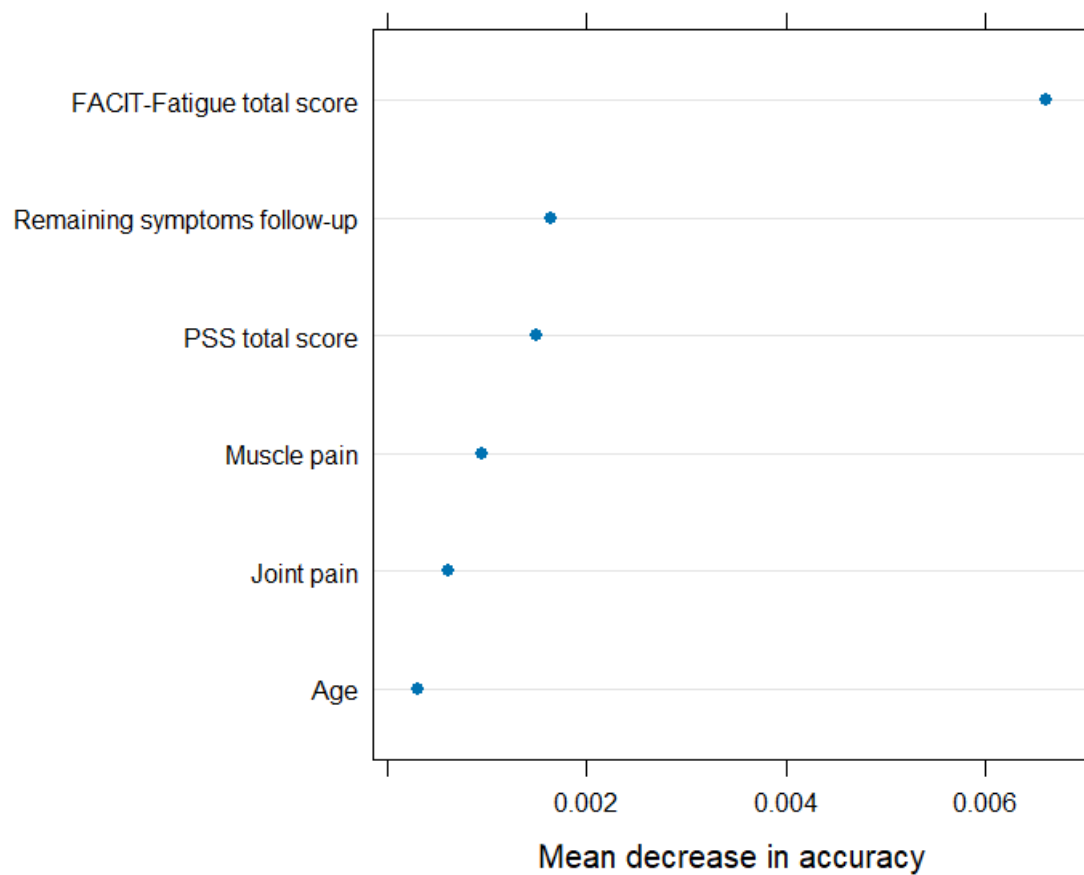

**Supplementary Fig. S11** Mean decrease in accuracy of the selected variables at follow-up after a random forest regression on the training set with the European Quality of Life 5 Dimensions 5 Level Version index as the dependent variable. FACIT-Fatigue Scale, Functional Assessment of Chronic Fatigue Illness – Fatigue Subscore; PSS, Perceived Stress Scale

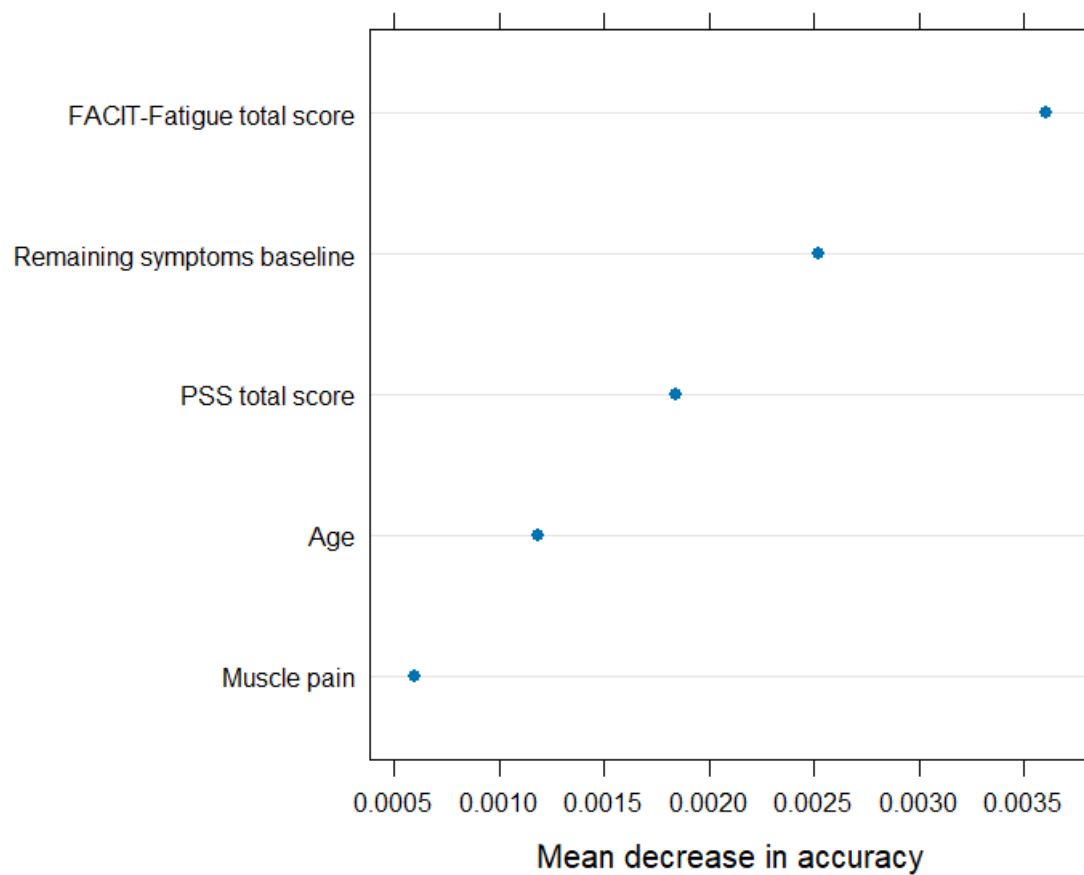

**Supplementary Fig. S12** Mean decrease in accuracy of the selected variables at baseline after a random forest regression on the training set with the European Quality of Life 5 Dimensions 5 Level Version index as the dependent variable for participants without a pre-diagnosed anxiety or depression. FACIT-Fatigue Scale, Functional Assessment of Chronic Fatigue Illness – Fatigue Subscore; PSS, Perceived Stress Scale

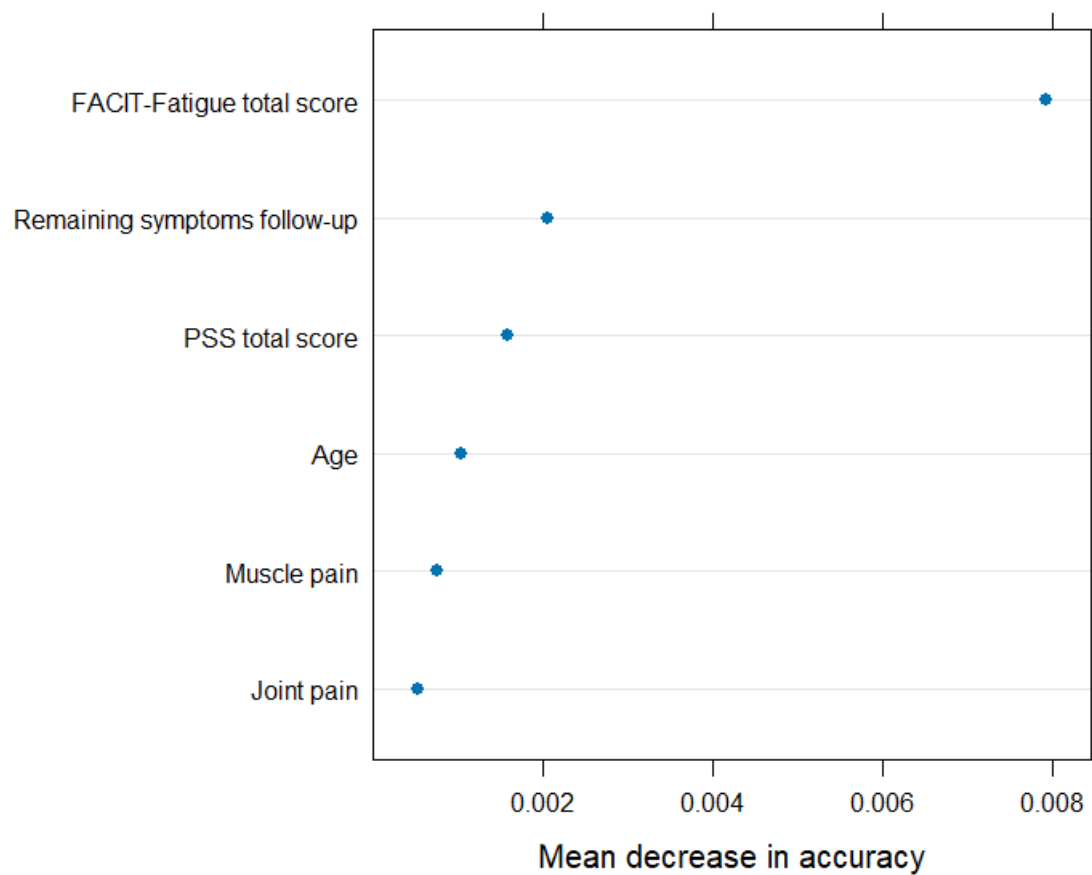

**Supplementary Fig. S13** Mean decrease in accuracy of the selected variables at follow-up after a random forest regression on the training set with the European Quality of Life 5 Dimensions 5 Level Version index as the dependent variable for participants without a pre-diagnosed anxiety or depression. FACIT-Fatigue Scale, Functional Assessment of Chronic Fatigue Illness – Fatigue Subscore; PSS, Perceived Stress Scale



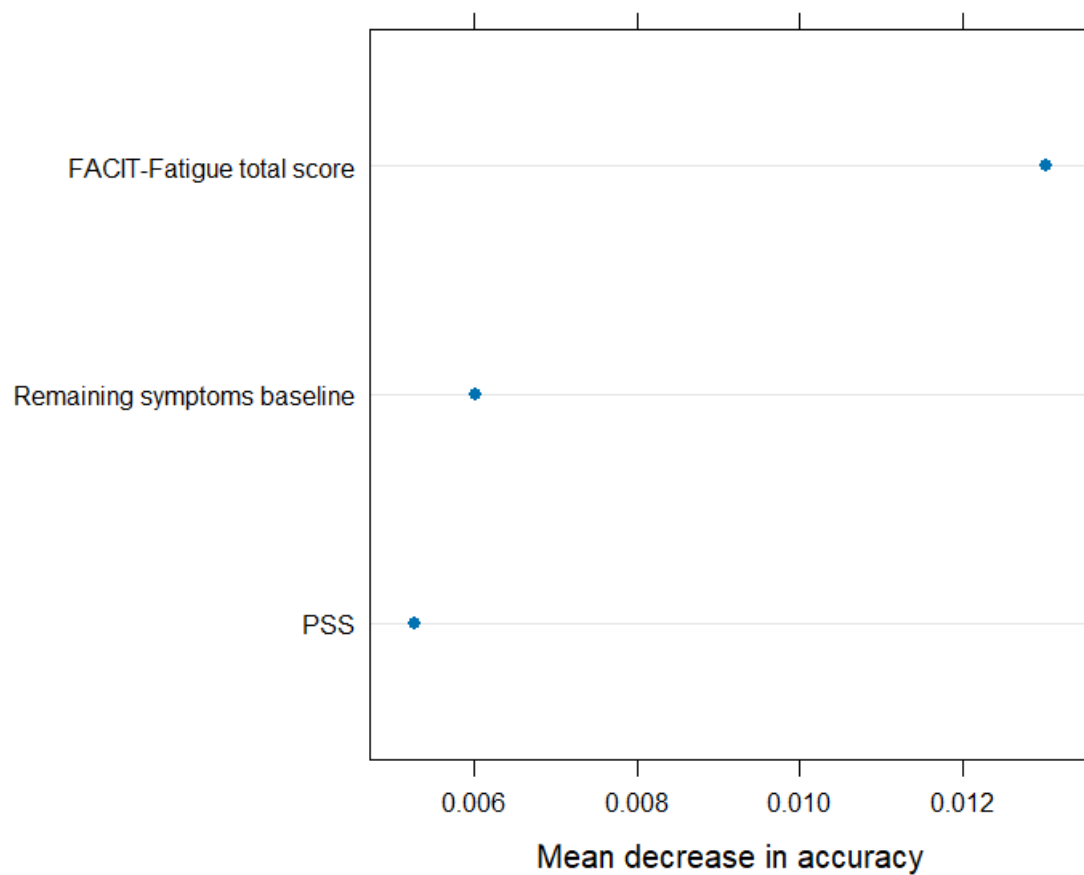

**Supplementary Fig. S14** Mean decrease in accuracy of the selected variables at baseline after a random forest regression on the training set with the European Quality of Life 5 Dimensions 5 Level Version index as the dependent variable for participants with a pre-diagnosed anxiety or depression. FACIT-Fatigue Scale, Functional Assessment of Chronic Fatigue Illness – Fatigue Subscore; PSS, Perceived Stress Scale

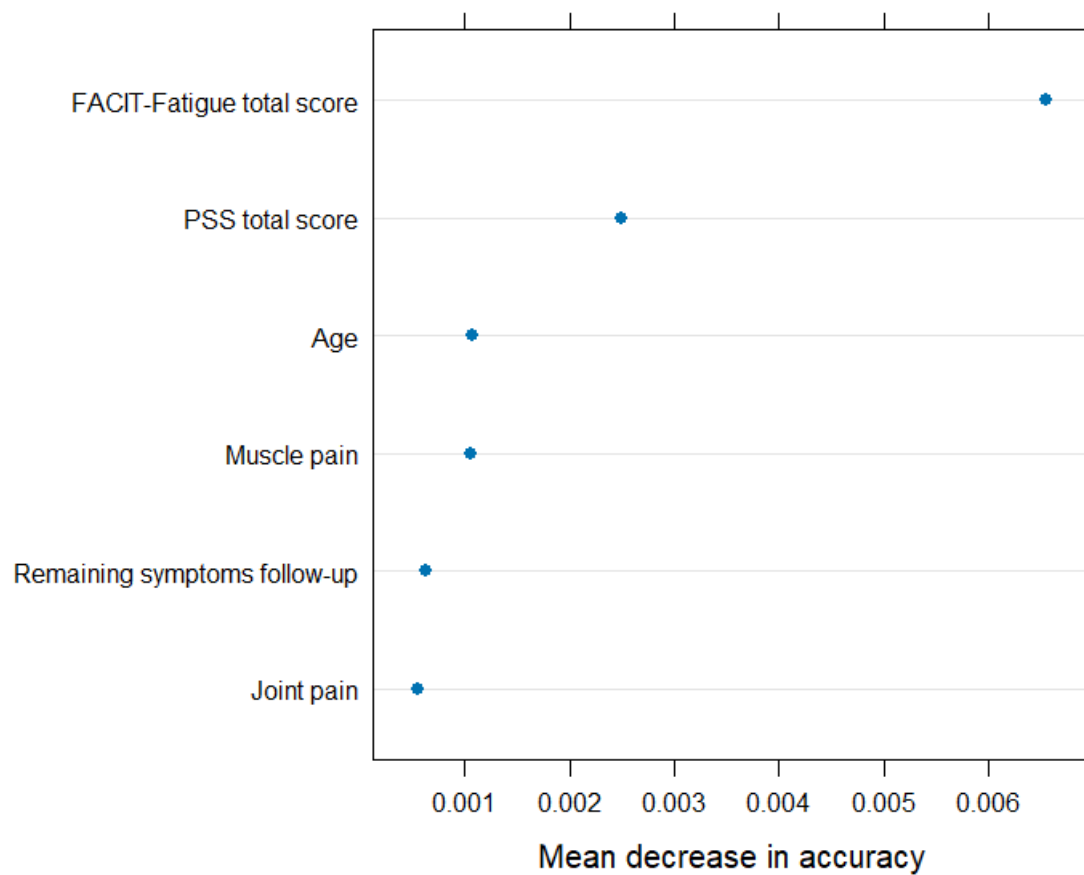

**Supplementary Fig. S15** Mean decrease in accuracy of the selected variables at follow-up after a random forest regression on the training set with the European Quality of Life 5 Dimensions 5 Level Version index as the dependent variable for participants with pre-diagnosed anxiety or depression. FACIT-Fatigue Scale, Functional Assessment of Chronic Fatigue Illness – Fatigue Subscore; PSS, Perceived Stress Scale

# Supplementary Table S16

Order of selected variables after recursive feature elimination for each final random forest regression model at baseline and follow-up.

| EQ-5D-5L                                                                               | During Baseline                                                                                |           |      | During Follow-Up                                                                                                 |           |      |
|----------------------------------------------------------------------------------------|------------------------------------------------------------------------------------------------|-----------|------|------------------------------------------------------------------------------------------------------------------|-----------|------|
|                                                                                        | Relevant independent variables                                                                 | $R^2$ [%] | RMSE | Relevant independent variables                                                                                   | $R^2$ [%] | RMSE |
| Index                                                                                  | 1. FACIT-Fatigue Scale<br>2. Muscle pain<br>3. Remaining symptoms<br>4. PSS<br>5. Age          | 39.22     | 0.11 | 1. FACIT-Fatigue Scale<br>2. Remaining symptoms<br>3. PSS<br>4. Muscle pain<br>5. Joint pain<br>6. Age           | 54.07     | 0.10 |
| Index – participants without a pre-diagnosed neurological/psychiatric disorder         | 1. FACIT-Fatigue Scale<br>2. Remaining symptoms baseline<br>3. PSS<br>4. Age<br>5. Muscle pain | 34.54     | 0.09 | 1. FACIT-Fatigue Scale<br>2. Remaining symptoms follow-up<br>3. PSS<br>4. Age<br>5. Muscle pain<br>6. Joint pain | 43.26     | 0.09 |
| Index – participants with at least one pre-diagnosed neurological/psychiatric disorder | 1. FACIT-Fatigue Scale<br>2. Remaining symptoms baseline<br>3. PSS                             | 30.22     | 0.15 | 1. FACIT-Fatigue Scale<br>2. PSS<br>3. Age<br>4. Muscle pain<br>5. Remaining symptoms<br>6. Joint pain           | 53.25     | 0.11 |

Note. EQ-5D-5L, European Quality of Life 5 Dimensions 5 Level Version; FACIT-Fatigue Scale, Functional Assessment of Chronic Fatigue Illness – Fatigue Subscore; PSS, Perceived Stress Scale

# Supplementary Table S17

*Coefficient of determination ( $R^2$ ) and root mean square error (RMSE) for each dimension of the EQ-5D-5L at baseline and follow-up*

| EQ-5D-5L           | During Baseline |      | During Follow-Up |      |
|--------------------|-----------------|------|------------------|------|
|                    | $R^2$ [%]       | RMSE | $R^2$ [%]        | RMSE |
| Mobility           | 28.58           | 0.61 | 23.43            | 0.59 |
| Self-Care          | 3.68            | 0.31 | 13.60            | 0.29 |
| Usual activities   | 47.12           | 0.62 | 51.04            | 0.55 |
| Pain/discomfort    | 37.76           | 0.72 | 39.56            | 0.70 |
| Anxiety/depression | 29.37           | 0.71 | 43.00            | 0.62 |

*Note.* Calculated using random forest regression models with FACIT-Fatigue Scale, age, PSS, number of symptoms remaining from initial SARS-CoV-2 infection, and muscle pain as independent variables. EQ-5D-5L, European Quality of Life 5 Dimensions 5 Level Version; FACIT-Fatigue Scale, Functional Assessment of Chronic Fatigue Illness – Fatigue Subscore; PSS, Perceived Stress Scale

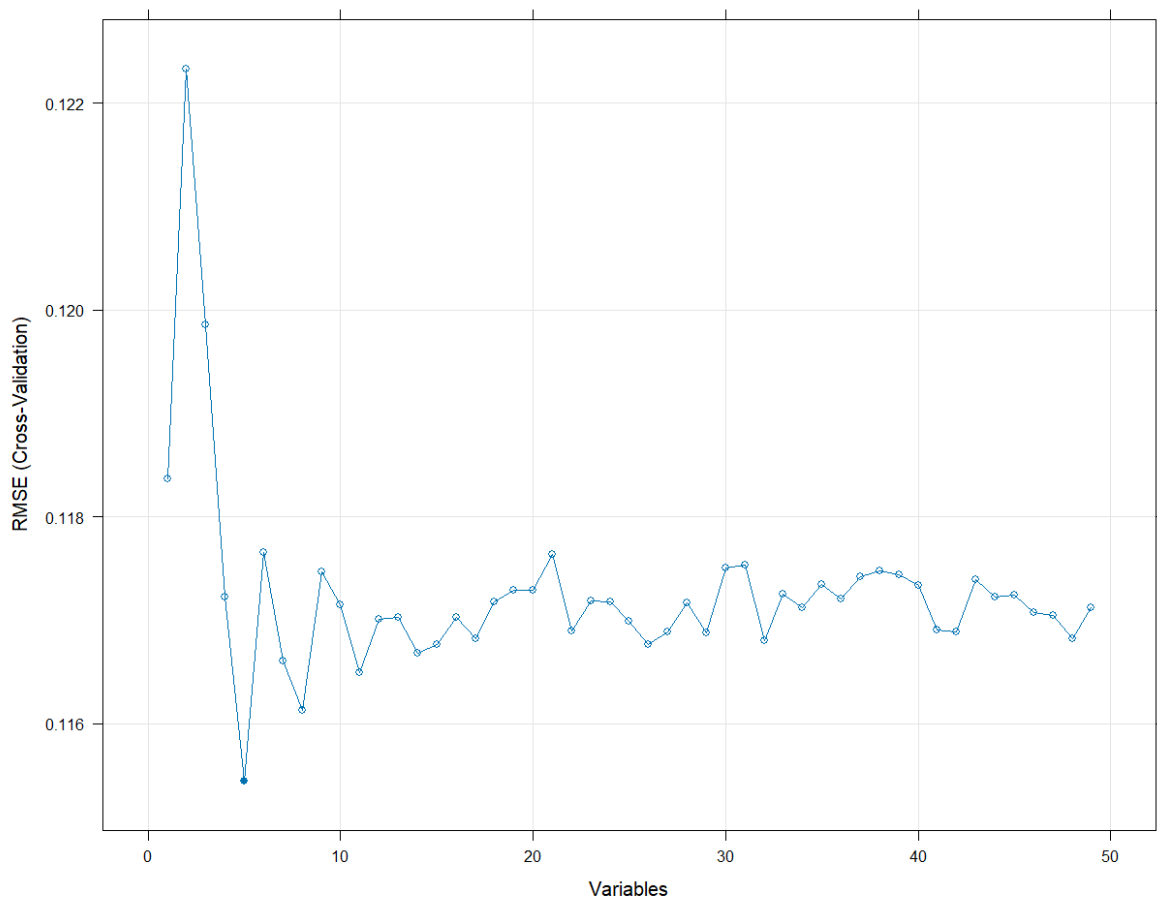

**Supplementary Fig. S18** Root mean square errors (RMSE) of the models calculated by recursive feature elimination predicting the European Quality of Life 5 Dimensions 5 Level Version EQ-5D-5L index at follow-up using baseline variables. It shows the model fit in dependence of the number of selected features. The dark-blue point is the number of features with the lowest RMSE. A 5-variable model was calculated as the model with the lowest RMSE of 0.12 to explain the EQ-5D-5L index.
